# Supplementary material
Source: PubMed Central journal article supplement (PMC3000354)

# 1A. Top View

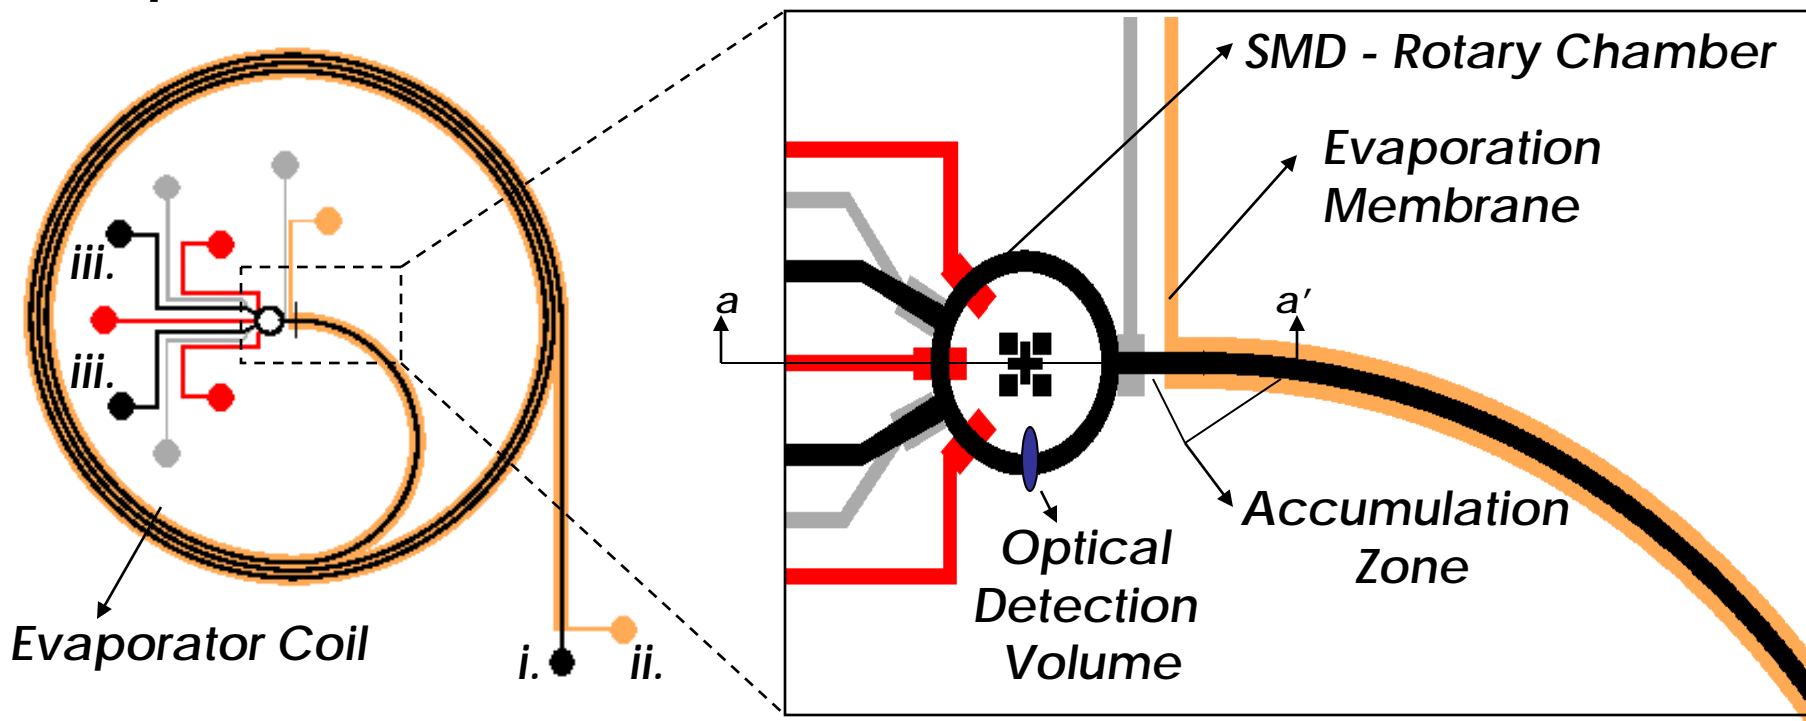

# 1B. Side View (a-a' cross section in top view)

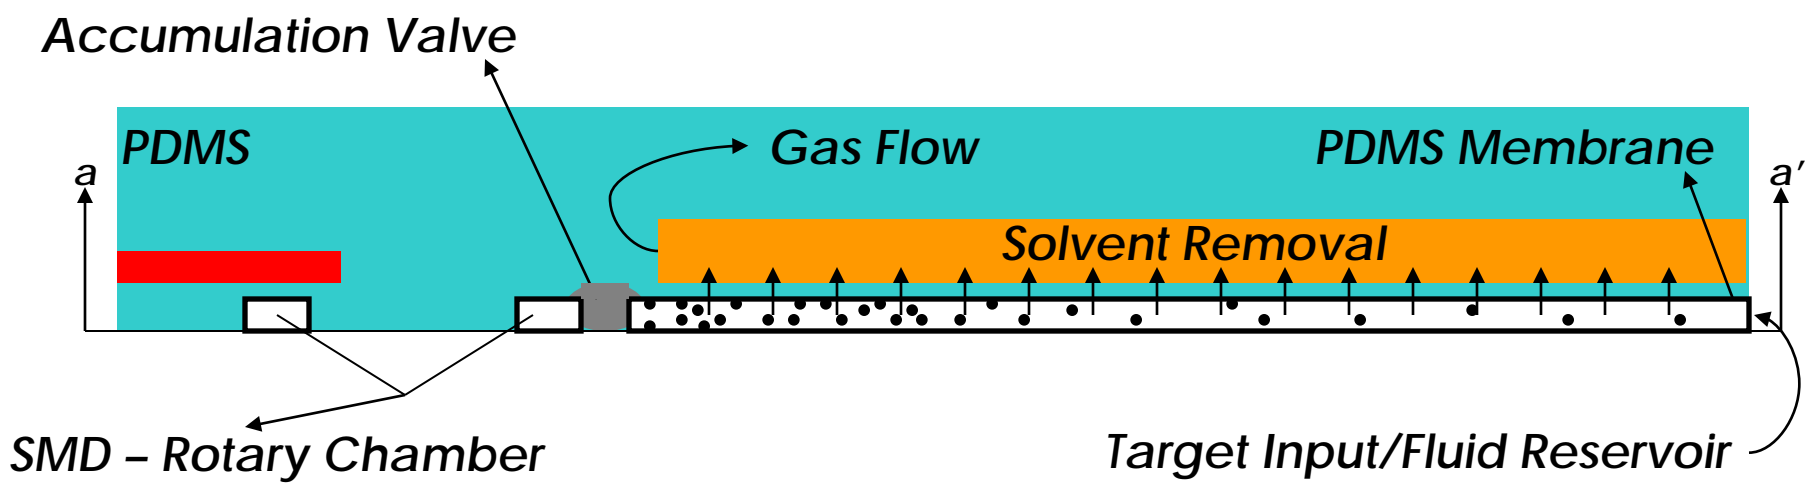

**A.**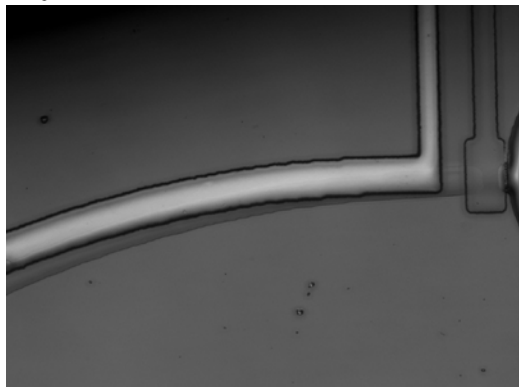**B.**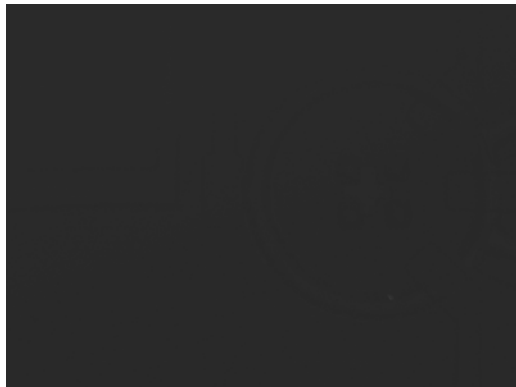**C.**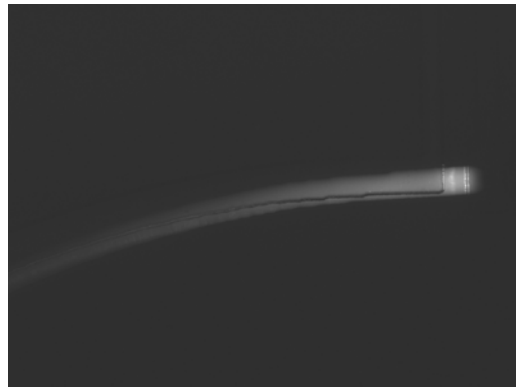**D.**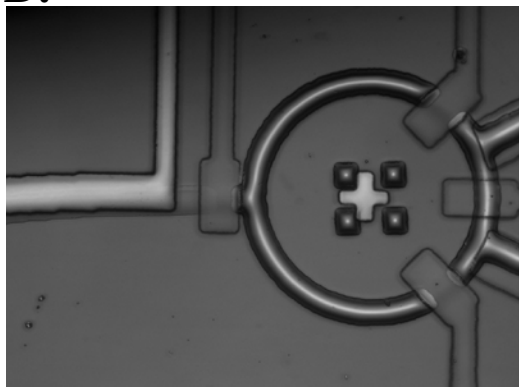**E.**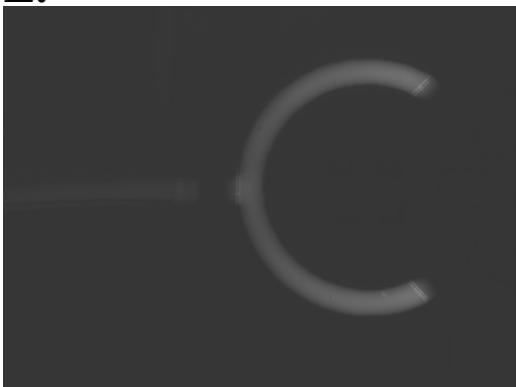**F.**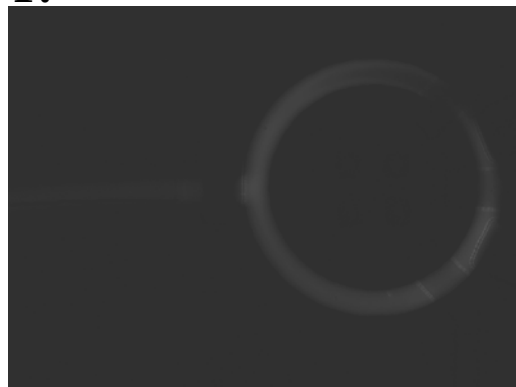

**3**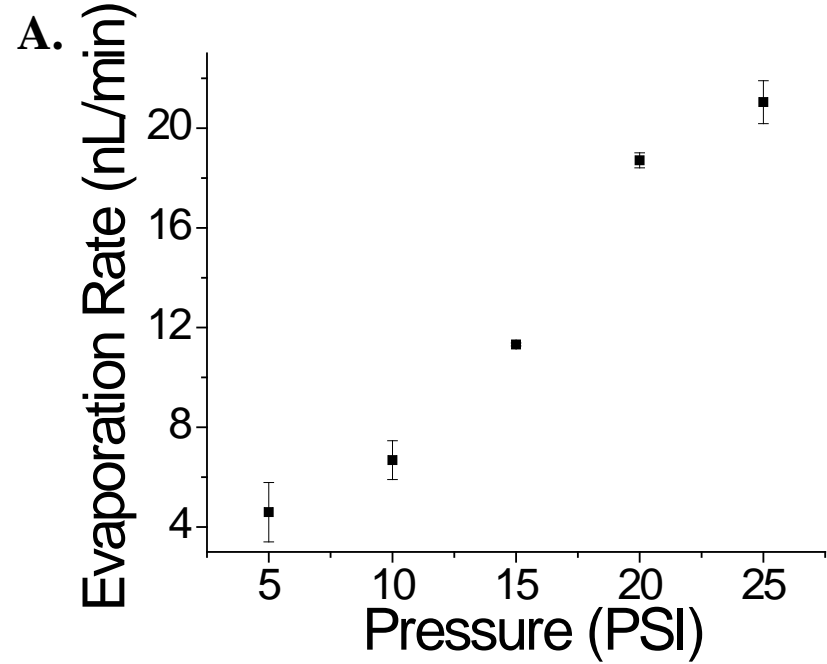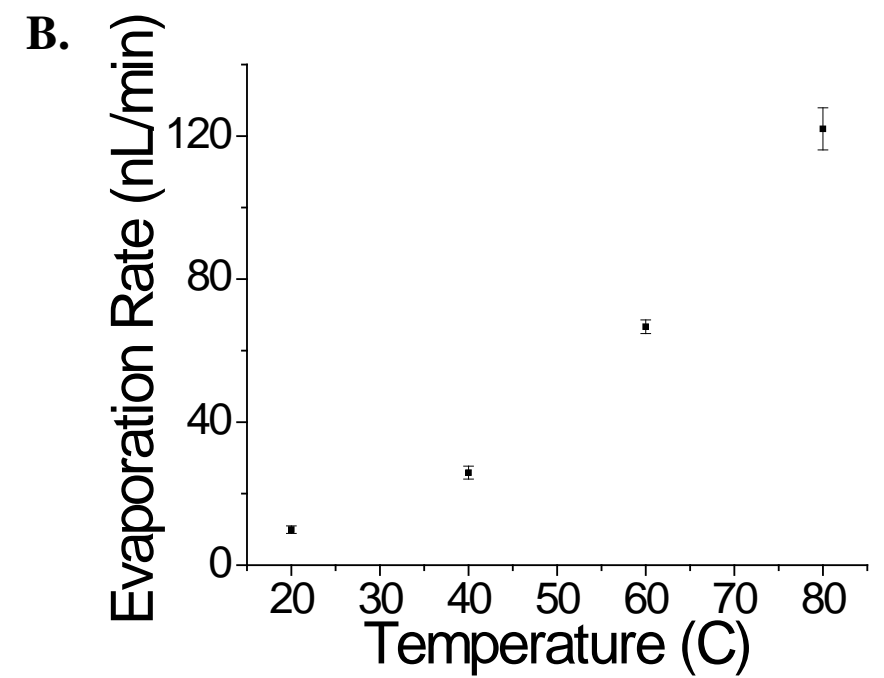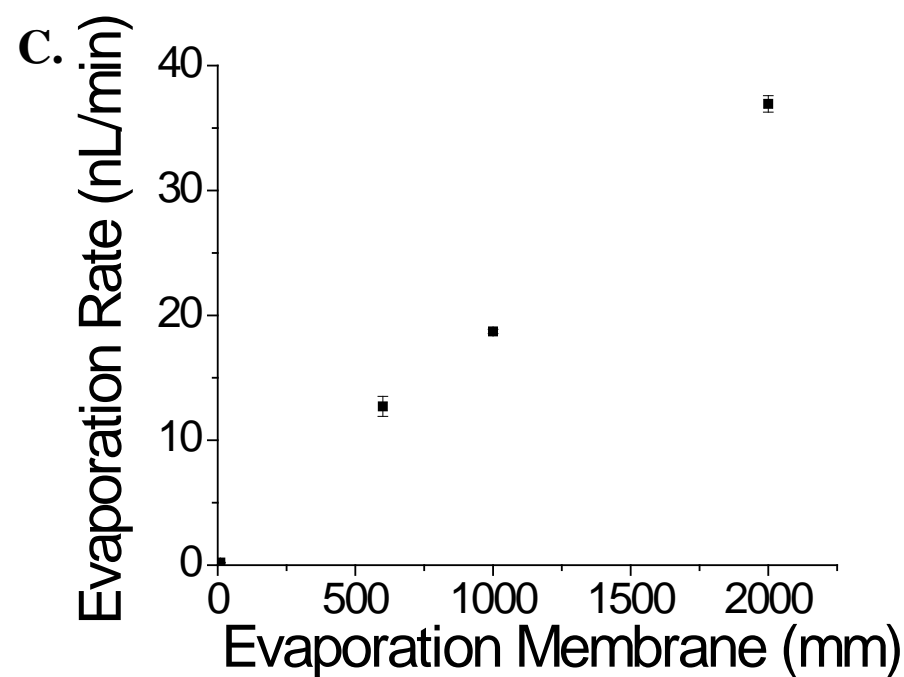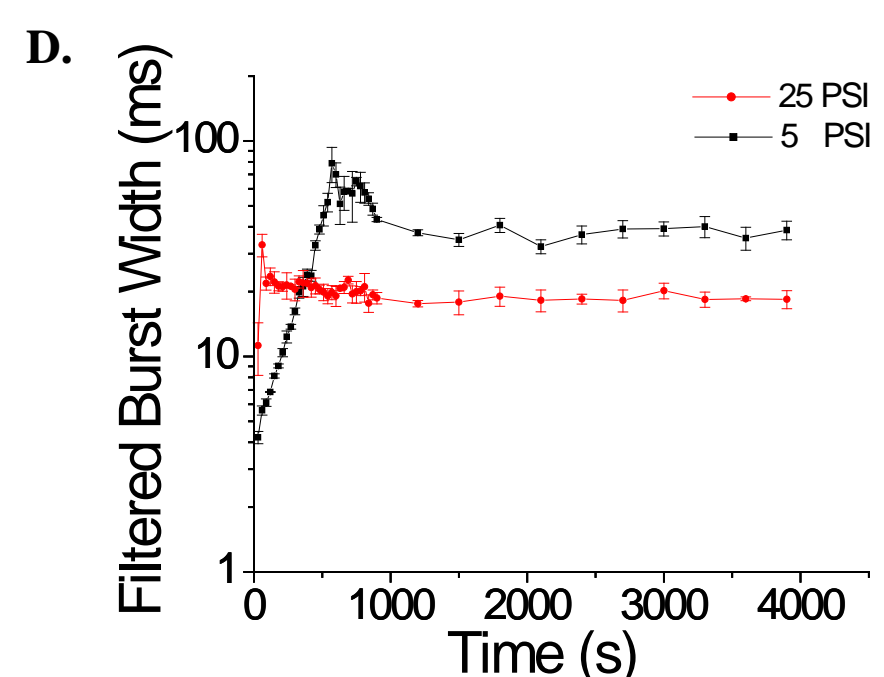

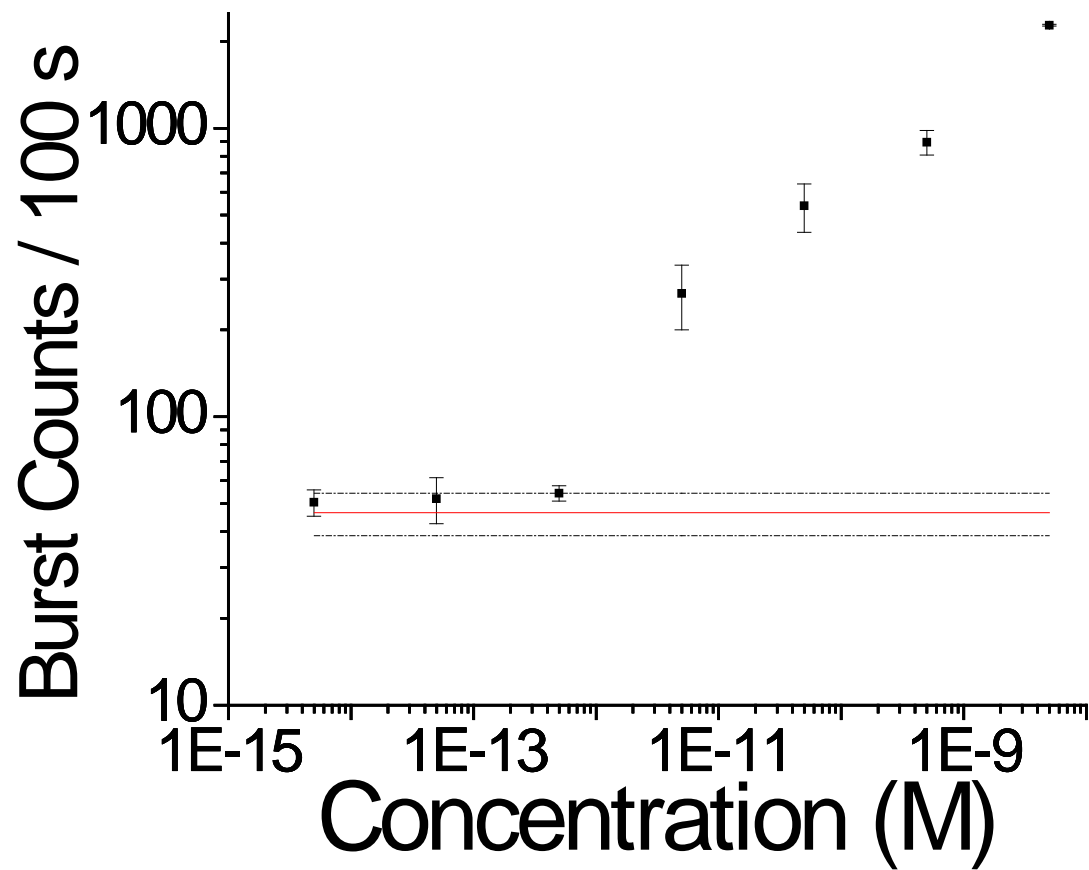

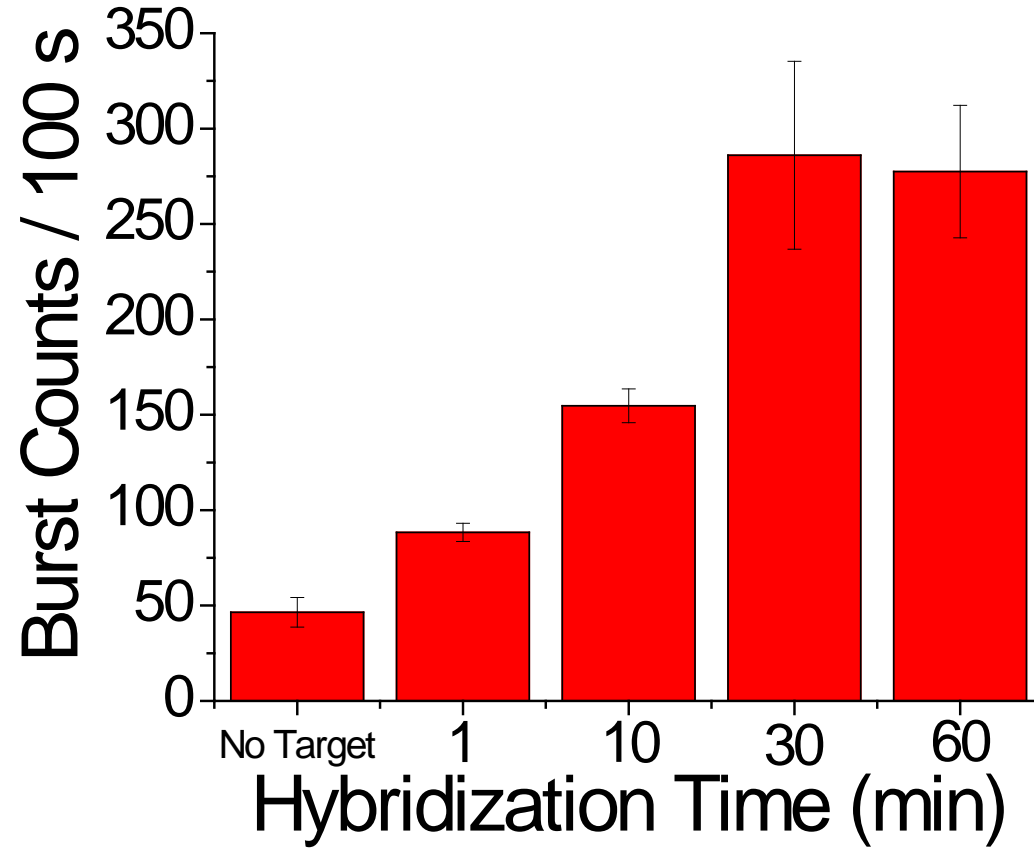

6

A.

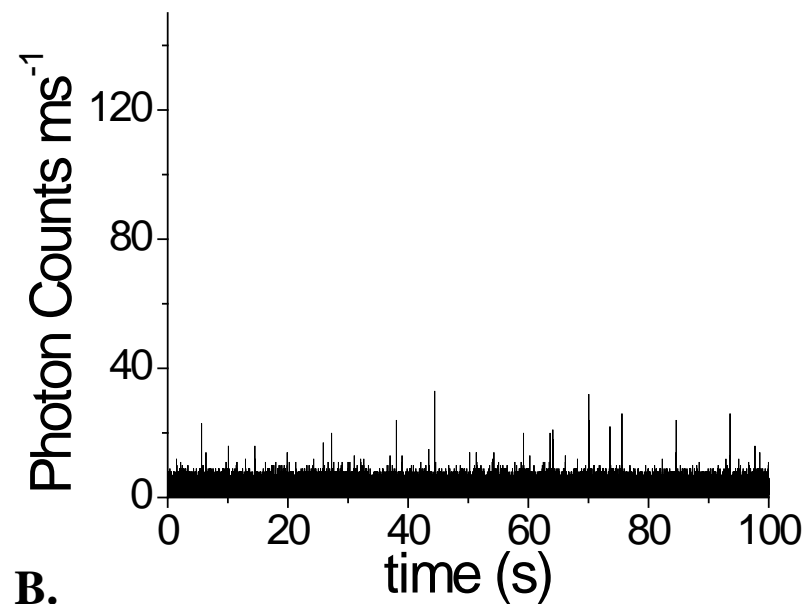

B.

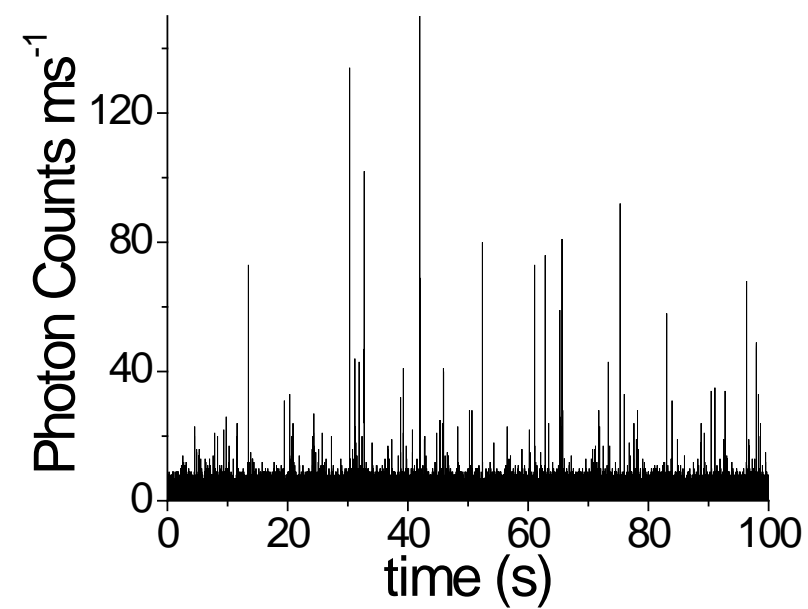

C.

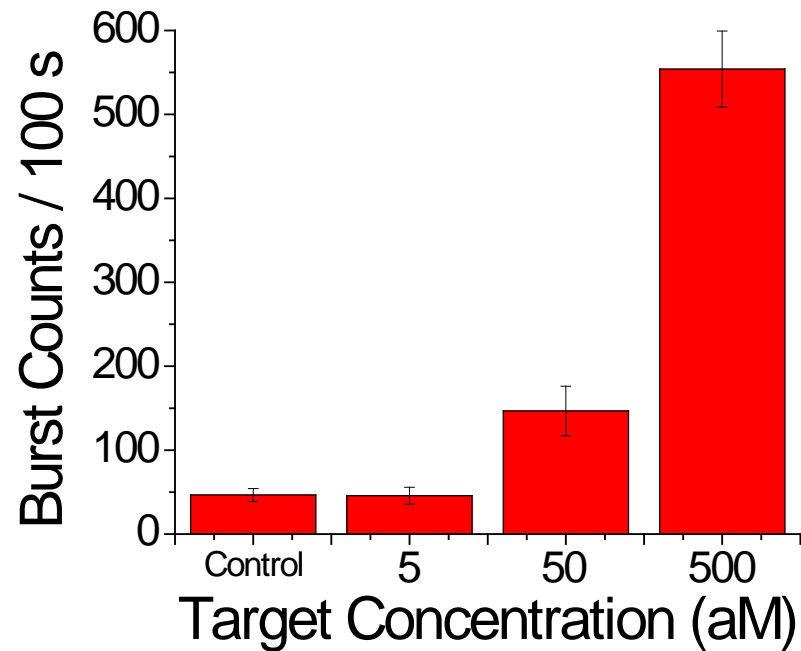

Supplement: NIHMS183229-supplement-supp.pdf [file NIHMS183229-supplement-supp.pdf]
